# Supplementary material for: A highly sensitive uric acid electrochemical biosensor based on a nano-cube cuprous oxide/ferrocene/uricase modified glassy carbon electrode
Source: PubMed Central journal article supplement (PMC7327035; doi:10.1038/s41598-020-67394-8), 2020-06-30
Supplement: 41598_2020_67394_MOESM1_ESM.pdf [file 41598_2020_67394_MOESM1_ESM.pdf]

# **A Highly Sensitive Uric Acid Electrochemical Biosensor Based on a Nano-cube Cuprous Oxide/Ferrocene/Urlicase Modified Glassy Carbon Electrode**

**Qinghua Yan<sup>1</sup> · Na Zhi<sup>1</sup> · Li Yang<sup>2\*</sup> · Guangri Xu<sup>2</sup> · Qigao  
Feng<sup>2</sup> · Qiqing Zhang<sup>1,3</sup> · Shujuan Sun<sup>4</sup>**

<sup>1</sup> *The Key Laboratory of Biomedical Material, School of Life Science and  
Technology, Xinxiang Medical University, Xinxiang, 453003, China*

<sup>2</sup> *School of Chemistry and Chemical Engineering, Henan Institute of Science and  
Technology, Xinxiang 453003, China*

<sup>3</sup> *Institute of Biomedical Engineering, Chinese Academy of Medical Sciences &  
Peking Union Medical College, Tianjin, 300192, China*

<sup>4</sup> *The Hospital of Eighty-third Group Army, Xinxiang, 453000, China*

\* Li Yang. Email: xkbhome@163.com    Tel: 86-373-3831887    Fax: 86-373-3831887

Qinghua Yan                    e-mail: yqh3499@163.com

Na Zhi                            e-mail: 2281652902@qq.com

Guangri Xu                    e-mail: guangrix@163.com

Qigao Feng                    e-mail: qigaof@163.com

Qiqing Zhang                e-mail: zhangqiq@126.com

Shujuan Sun                 e-mail: 252776013@qq.com

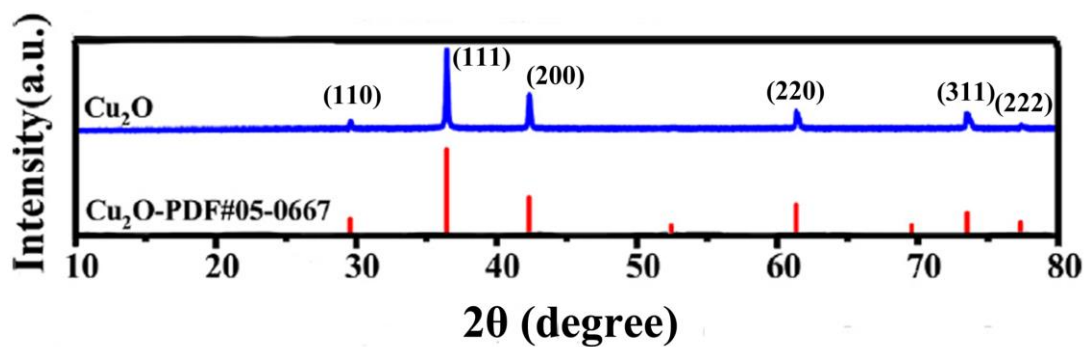

Fig. S1 Powder x-ray diffraction patterns of  $\text{Cu}_2\text{O}$  NPs was compared with the standard pattern of cuprous oxide cubic crystal system (PDF#05-0667)

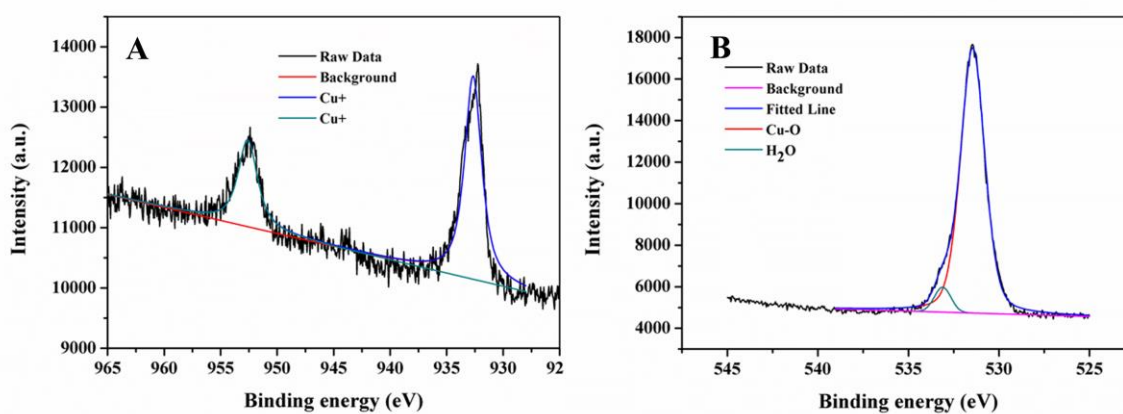

Fig. S2 XPS spectrum of  $\text{Cu}_2\text{O}$  NPs.

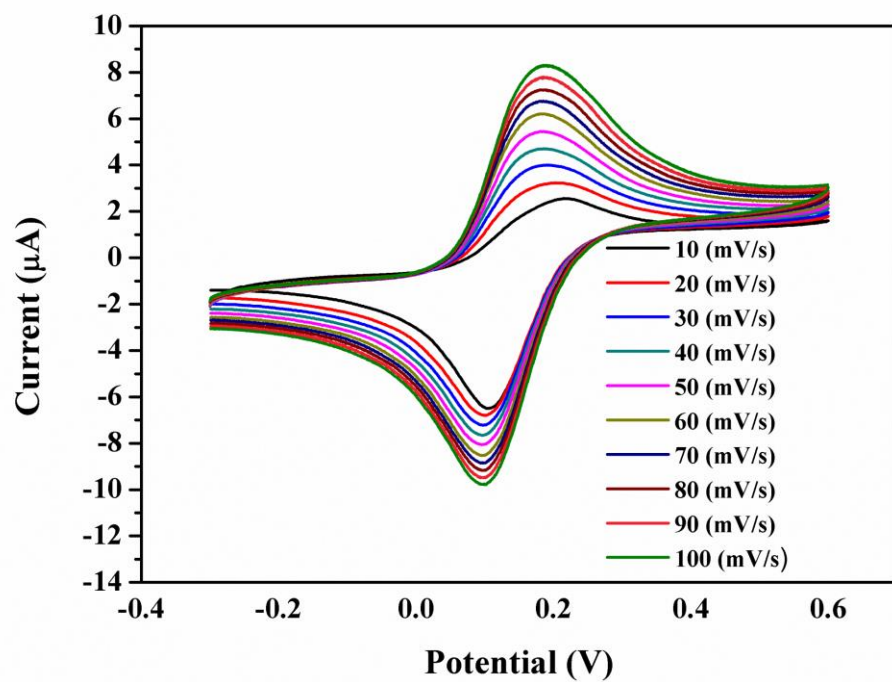

Fig. S3 The reaction kinetics of UO<sub>x</sub>/Fc/Cu<sub>2</sub>O/GCE electrode obtained by CV at scan rates from 10 to 110 mV s<sup>-1</sup> in 0.1 M KCl solution
